# Supplementary material for: Direct utilization of light energy to promote the power density of zinc–air batteries using Co 3 O 4 @Cu x O air photocathodes with porous octahedral superstructures
Source: Royal Society of Chemistry journal article supplement (doi:10.1039/d4ta06461e), 2024-11-25
Supplement: d4ta06461e1.pdf [file d4ta06461e1.pdf]

## Electronic supplementary information

### Direct utilization of light energy to promote the power density of zinc-air batteries using $\text{Co}_3\text{O}_4@\text{Cu}_x\text{O}$ air photocathodes with porous octahedral superstructures

*Yuhao Zhong,<sup>a</sup> Jing Xie,<sup>ab</sup> Ruitong Xu,<sup>a</sup> Xiaobo Feng,<sup>ac</sup> and Ting Zhu<sup>ac\*</sup>*

<sup>a</sup> School of Physics and Electronic Information, Yunnan Normal University, 768 Juxian Street, Kunming 650500, Yunnan, China.

<sup>b</sup> School of Materials Science and Engineering, Central South University, 932 Lushan Road South, Changsha 410083, Hunan, China.

<sup>c</sup> Yunnan Key Laboratory of Optoelectronic Information Technology, School of Physics and Electronic Information, Yunnan Normal University, Kunming 650500, China.

\*Email: [zhut0002@ynnu.edu.cn](mailto:zhut0002@ynnu.edu.cn) (T. Zhu)

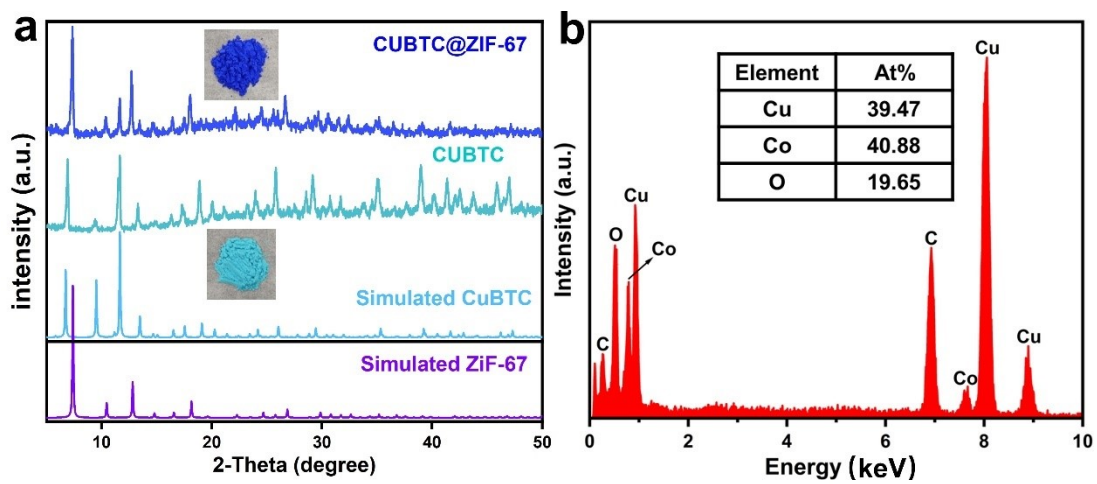

**Fig. S1.** XRD (a) and EDX (b) patterns of CuBTC (a) and ZIF67@CuBTC (a and b).

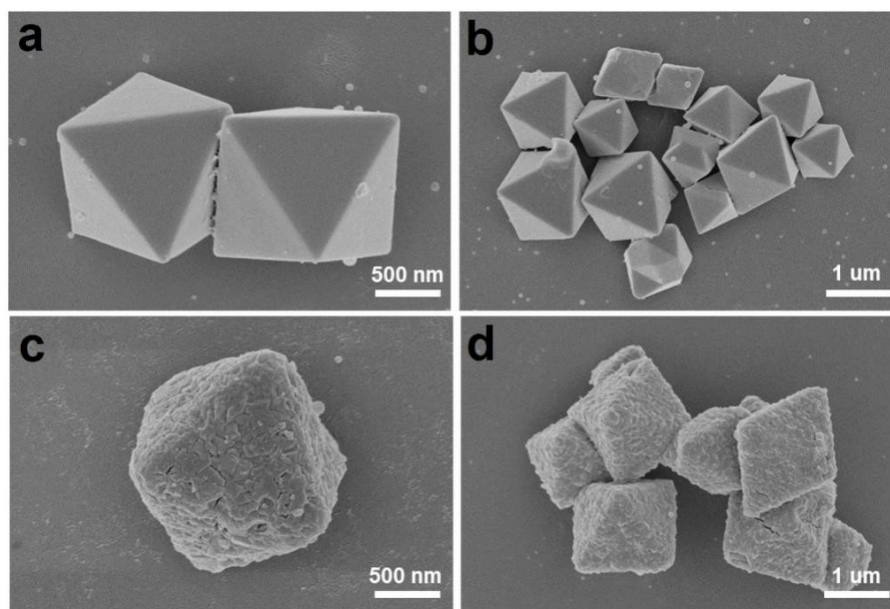

**Fig. S2.** SEM images of CuBTC (a and b) and ZIF67@CuBTC (c and d).

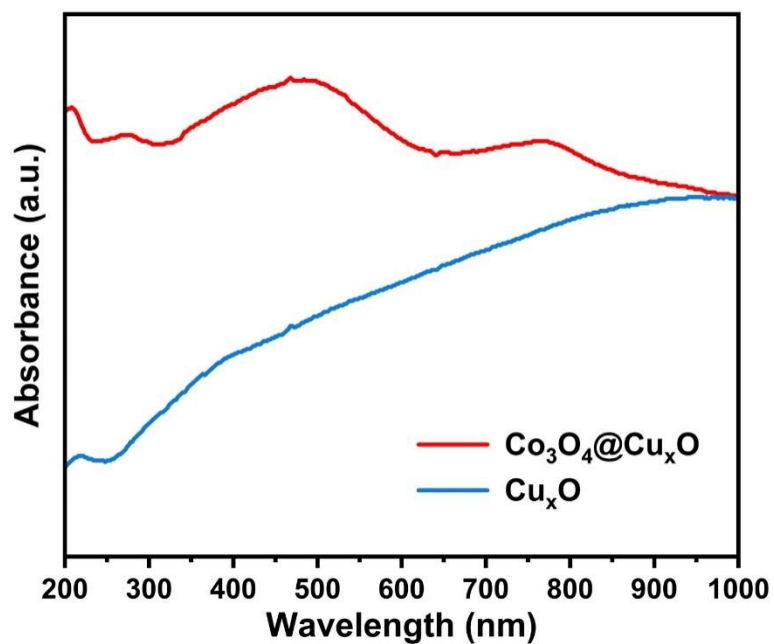

**Fig. S3.** UV-Vis-NIR spectra of the  $\text{Cu}_x\text{O}$  and  $\text{Co}_3\text{O}_4@\text{Cu}_x\text{O}$  samples.

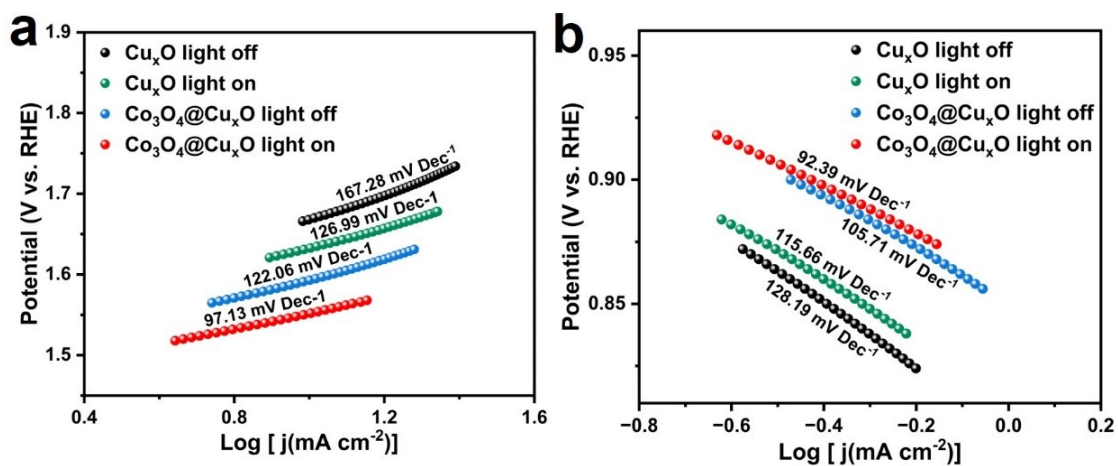

**Fig. S4.** Tafel plots of OER (a) and ORR (b) for the  $\text{Cu}_x\text{O}$  and  $\text{Co}_3\text{O}_4@\text{Cu}_x\text{O}$  samples obtained under light on and off conditions, respectively.

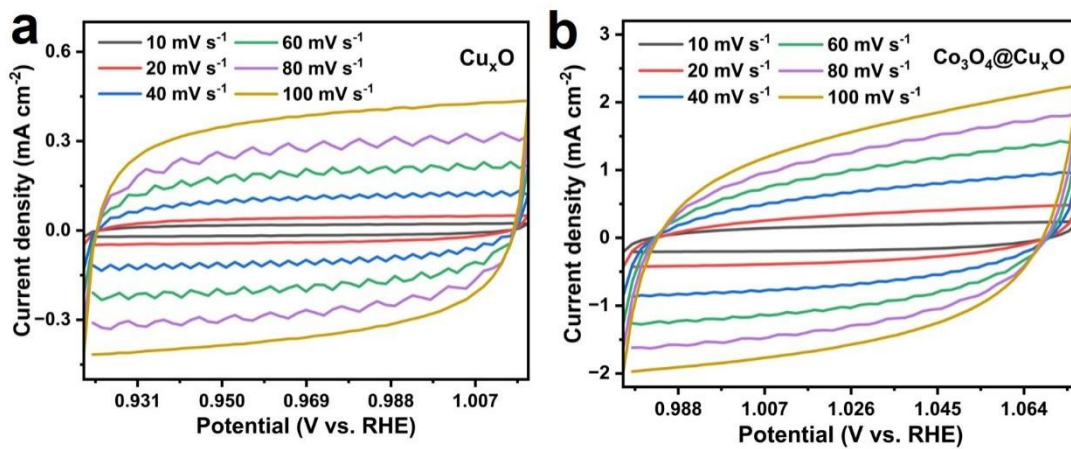

**Fig. S5.** CV curves collected from the non-Faradaic regions of the  $\text{Cu}_x\text{O}$  (a) and  $\text{Co}_3\text{O}_4@\text{Cu}_x\text{O}$  (b) samples, respectively.

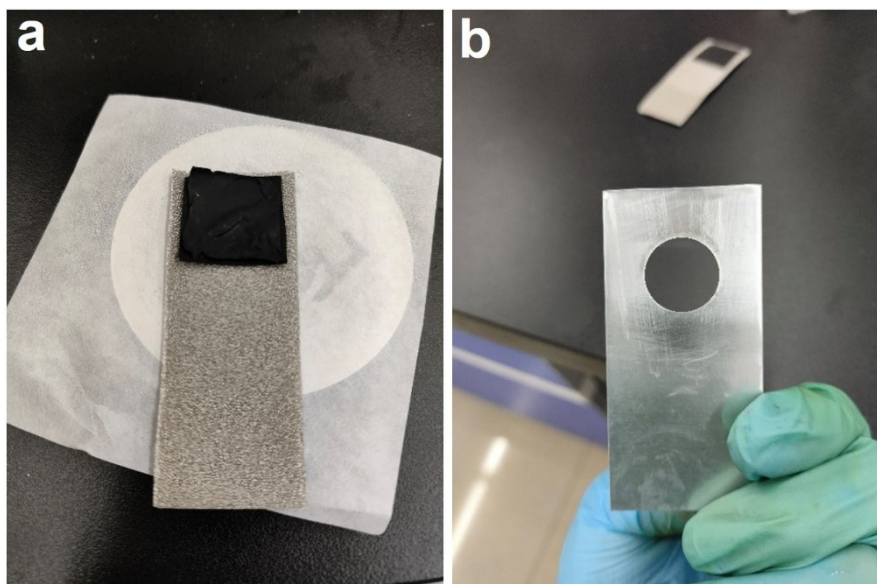

**Fig. S6.** Optical images of the building components of a ZAB cell: the air cathode (a, composed of water-proof membrane, nickel foam, and  $\text{Co}_3\text{O}_4@\text{Cu}_x\text{O}/\text{PTFE}$ /acetylene black film), and the Zn foil anode (b, with a punched hole for light passing through).

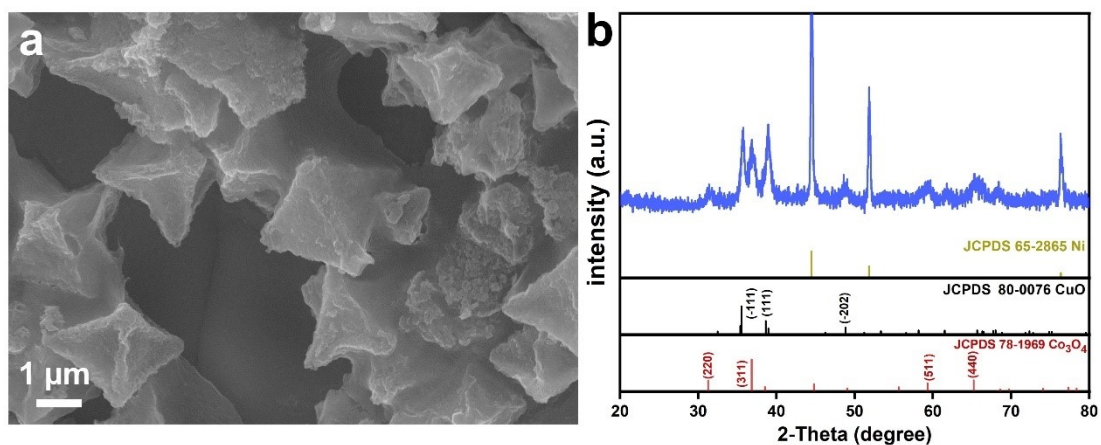

**Fig. S7.** The SEM image (a) and XRD pattern (b) of the  $\text{Co}_3\text{O}_4@\text{Cu}_x\text{O}$  sample after cycling test.

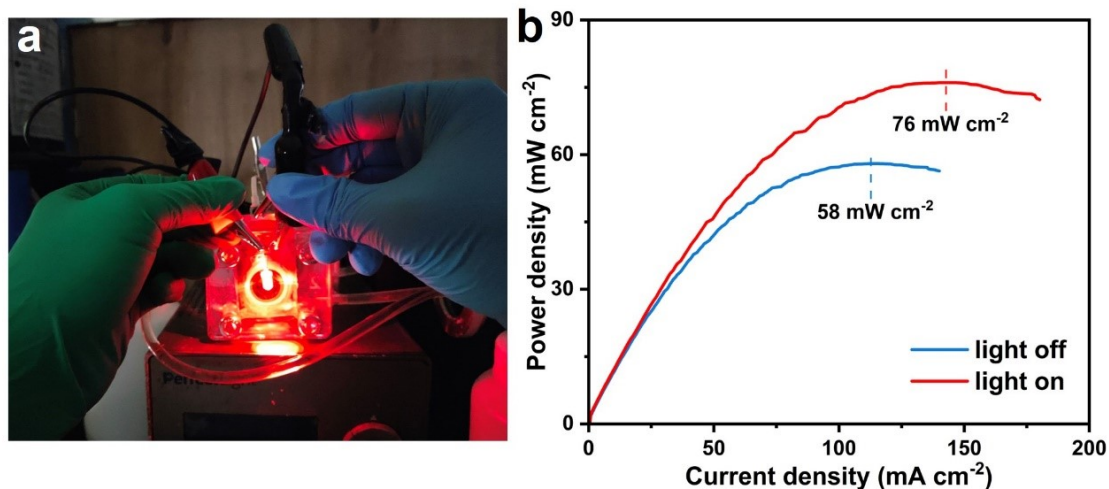

**Fig. S8.** A demonstration of a red LED lighted up by two connected ZAB cells (a), and power densities of the  $\text{Co}_3\text{O}_4@\text{Cu}_x\text{O}$ -based ZABs obtained with light on and off conditions, respectively. The power densities were calculated by the discharge current densities shown in Fig. 4c.

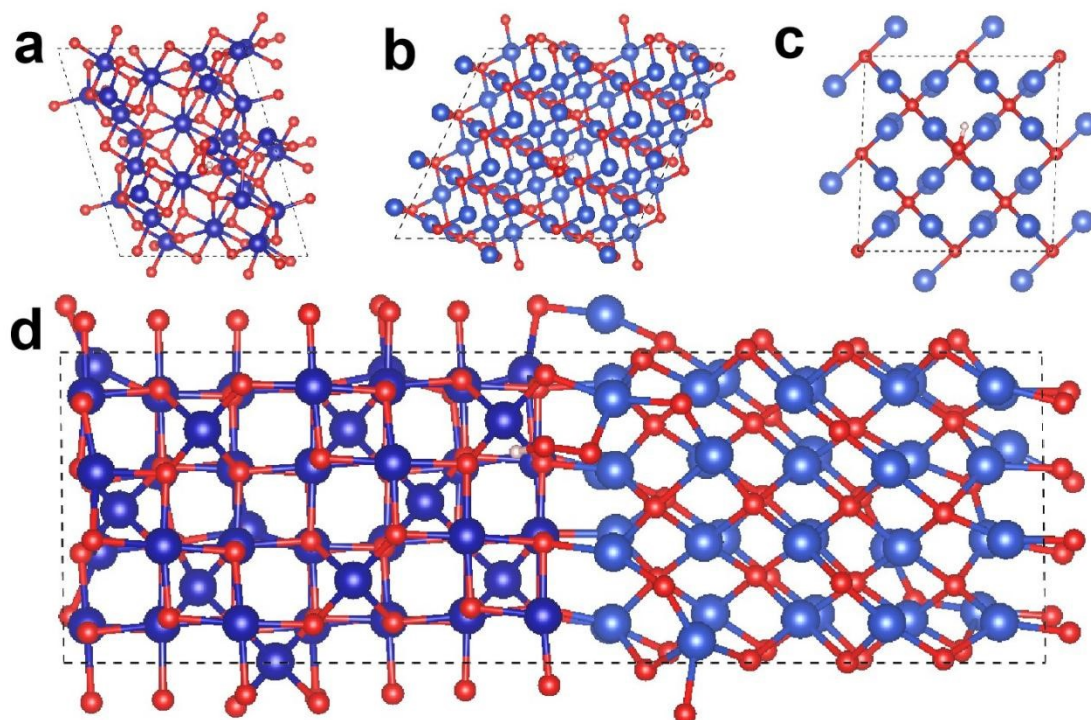

**Fig. S9.** Optimized atomic configurations of  $\text{OOH}^*$  adsorbed on  $\text{Co}_3\text{O}_4(311)$  (a),  $\text{CuO}(-111)$  (b),  $\text{Cu}_2\text{O}(200)$  (c), and  $\text{Co}_3\text{O}_4@Cu_xO$  heterojunction(d), respectively.

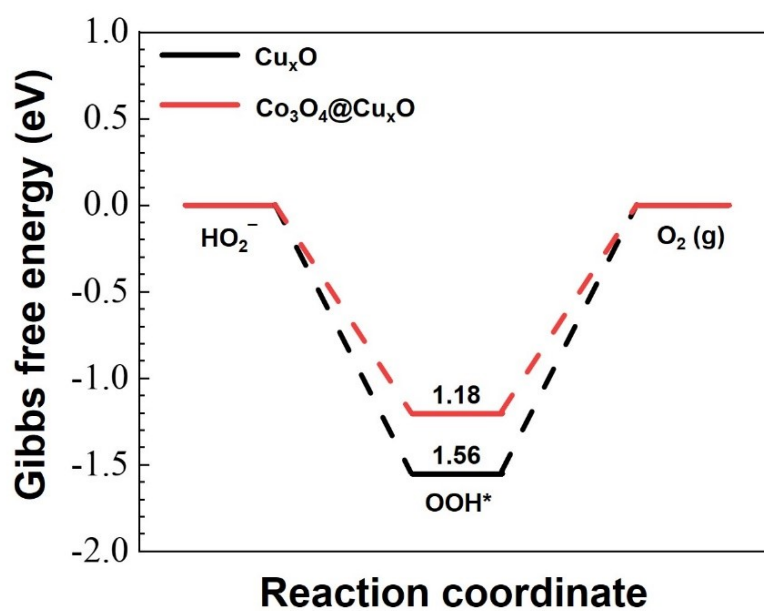

**Fig. S10.** Free energy diagrams at 0.68 V of OER processes on  $\text{Cu}_x\text{O}$  and  $\text{Co}_3\text{O}_4@Cu_xO$ , respectively.

**Table S1.** A comparison of the air cathode materials for ZABs with and without light enhancements.

| Type                | Cathode materials                                                                  | Charge voltage /V |              | Current density /mA cm <sup>-2</sup> | Light enhancement /% | Cycling /h | Capacity / mA h g <sup>-1</sup> | Power density /mW cm <sup>-2</sup> | Ref.             |
|---------------------|------------------------------------------------------------------------------------|-------------------|--------------|--------------------------------------|----------------------|------------|---------------------------------|------------------------------------|------------------|
|                     |                                                                                    | Dark              | Light        |                                      |                      |            |                                 |                                    |                  |
| Photo-enhanced ZABs | <b>Co<sub>3</sub>O<sub>4</sub>@Cu<sub>x</sub>O</b>                                 | <b>1.837</b>      | <b>1.748</b> | <b>0.1</b>                           | <b>31</b>            | <b>160</b> | <b>759.12</b>                   | <b>76</b>                          | <b>This work</b> |
|                     | α-Fe <sub>2</sub> O <sub>3</sub>                                                   | 1.97              | 1.43         | 0.1                                  | 27.4                 | /          | 598.7                           | 75.49                              | [1]              |
|                     | BiVO <sub>4</sub>                                                                  | 1.96              | 1.20         | 0.1                                  | 38.8                 | /          | 538.5                           | 69.24                              | [1]              |
|                     | Co <sub>3</sub> O <sub>4</sub>                                                     | 2.10              | 2.00         | 2                                    | 5.00                 | 70         | 769                             | /                                  | [2]              |
|                     | NiCo <sub>2</sub> S <sub>4</sub>                                                   | 1.97              | 1.92         | 2                                    | 2.54                 | 12         | 734                             | /                                  | [3]              |
|                     | Ni <sub>2</sub> P <sub>5</sub> @NCNT                                               | 1.94              | 1.90         | 10                                   | 2.10                 | 8.8        | 640                             | 190                                | [4]              |
|                     | PTTH                                                                               | 2.08              | 1.92         | 0.1                                  | 7.69                 | 316        | /                               | /                                  | [5]              |
|                     | CuO/ZnO                                                                            | 2.27              | 1.5          | 0.05                                 | 33.7                 | 3          | 333.5                           | 34.01                              | [6]              |
|                     | TiO <sub>2</sub> @In <sub>2</sub> Se <sub>3</sub> @Ag <sub>3</sub> PO <sub>4</sub> | /                 | 0.64         | 0.1                                  | /                    | 210        | /                               | 13.1/                              | [7]              |
|                     | g-C <sub>3</sub> N <sub>4</sub> -CuZIF-67                                          | 2.01              | 1.94         | 2                                    | 3.5                  | 20         | 781.7                           | /                                  | [8]              |
| Conventional ZABs   | Co <sub>2</sub> FeO <sub>4</sub> @NCNTs                                            | 2.32              | /            | 50                                   | /                    | 100        | /                               | 90.68                              | [9]              |
|                     | Co <sub>3</sub> O <sub>4-x</sub> @C                                                | 2.07              | /            | 10                                   | /                    | 358        | /                               | 54.5                               | [10]             |
|                     | Co@Co <sub>3</sub> O <sub>4</sub> @NAC                                             | 2.10              | /            | 5                                    | /                    | 36         | 721                             | 164                                | [11]             |
|                     | Fe <sub>3</sub> C/Fe <sub>2</sub> O <sub>3</sub> @NGNs                             | 2.11              | /            | 10                                   | /                    | 40         | 722                             | 139.8                              | [12]             |
|                     | FeN <sub>x</sub> /C                                                                | 2.08              | /            | 5                                    | /                    | 84         | /                               | 36                                 | [13]             |

[1] Liu X, Yuan Y, Liu J, et al. Utilizing solar energy to improve the oxygen evolution reaction kinetics in zinc-air battery[J]. Nat Commun, 2019, 10(1): 4767.

[2] Tomon C, Sarawutanukul S, Duangdangchote S, et al. Photoactive Zn-air batteries using spinel-type cobalt oxide as a bifunctional photocatalyst at the air cathode[J]. Chem Commun (Camb), 2019, 55(42): 5855-5858.

[3] Sarawutanukul S, Tomon C, Duangdangchote S, et al. Rechargeable Photoactive Zn-Air Batteries Using NiCo<sub>2</sub>S<sub>4</sub> as an Efficient Bifunctional Photocatalyst towards OER/ORR at the Cathode[J]. Batteries & Supercaps, 2020, 3(6): 541-547.

[4] Lv J, Abbas S C, Huang Y, et al. A photo-responsive bifunctional electrocatalyst for oxygen

- reduction and evolution reactions[J]. *Nano Energy*, 2018, 43: 130-137.
- [5] Zhu D, Zhao Q, Fan G, et al. Photoinduced Oxygen Reduction Reaction Boosts the Output Voltage of a Zinc-Air Battery[J]. *Angew Chem Int Ed Engl*, 2019, 58(36): 12460-12464.
- [6] Bu D, Batmunkh M, Zhang Y, et al. Rechargeable sunlight-promoted Zn-air battery constructed by bifunctional oxygen photoelectrodes: Energy-band switching between ZnO/Cu<sub>2</sub>O and ZnO/CuO in charge-discharge cycles[J]. *Chemical Engineering Journal*, 2022, 433: 133559.
- [7] Feng H, Zhang C, Liu Z, et al. A light-activated TiO<sub>2</sub>@In<sub>2</sub>Se<sub>3</sub>@Ag<sub>3</sub>PO<sub>4</sub> cathode for high-performance Zn-Air batteries[J]. *Chemical Engineering Journal*, 2022, 434: 134650.
- [8] Ren R, Liu G, Kim J Y, et al. Photoactive g-C<sub>3</sub>N<sub>4</sub>/CuZIF-67 bifunctional electrocatalyst with staggered p-n heterojunction for rechargeable Zn-air batteries[J]. *Applied Catalysis B: Environmental*, 2022, 306: 121096.
- [9] Wang X T, Ouyang T, Wang L, et al. Redox-Inert Fe(3+) Ions in Octahedral Sites of Co-Fe Spinel Oxides with Enhanced Oxygen Catalytic Activity for Rechargeable Zinc-Air Batteries[J]. *Angew Chem Int Ed Engl*, 2019, 58(38): 13291-13296.
- [10] Chen D, Pan L, Pei P, et al. Carbon-coated oxygen vacancies-rich Co<sub>3</sub>O<sub>4</sub> nanoarrays grow on nickel foam as efficient bifunctional electrocatalysts for rechargeable zinc-air batteries[J]. *Energy*, 2021, 224: 120142.
- [11] Zhong X, Yi W, Qu Y, et al. Co single-atom anchored on Co<sub>3</sub>O<sub>4</sub> and nitrogen-doped active carbon toward bifunctional catalyst for zinc-air batteries[J]. *Applied Catalysis B: Environmental*, 2020, 260: 118188.
- [12] Tian Y, Xu L, Qian J, et al. Fe<sub>3</sub>C/Fe<sub>2</sub>O<sub>3</sub> heterostructure embedded in N-doped graphene as a bifunctional catalyst for quasi-solid-state zinc-air batteries[J]. *Carbon*, 2019, 146: 763-771.
- [13] Han S, Hu X, Wang J, et al. Novel Route to Fe-Based Cathode as an Efficient Bifunctional Catalysts for Rechargeable Zn-Air Battery[J]. *Advanced Energy Materials*, 2018, 8(22): 1800955.
